# Supplementary material
Source: Elsevier journal article supplement (https://comptes-rendus.academie-sciences.fr/chimie/article/10.1016/j.crci.2012.04.007/file/attach/mmc5.pdf)

# checkCIF/PLATON report

You have not supplied any structure factors. As a result the full set of tests cannot be run.

No syntax errors found.      CIF dictionary      Interpreting this report

## Datablock: compound\_5

---

Bond precision:    C-C = 0.0105 A                      Wavelength=0.71073

Cell:                      a=7.331(5)                      b=21.735(5)                      c=7.213(5)  
                                    alpha=90                      beta=90                      gamma=90

Temperature:                      293 K

|                        | Calculated      | Reported        |
|------------------------|-----------------|-----------------|
| Volume                 | 1149.3(11)      | 1149.3(11)      |
| Space group            | P m n n         | Pmnn            |
| Hall group             | -P 2n 2         | ?               |
| Moiety formula         | C9 H10 N2 O5 Zn | ?               |
| Sum formula            | C9 H10 N2 O5 Zn | C9 H10 N2 O5 Zn |
| Mr                     | 291.58          | 291.56          |
| Dx,g cm <sup>-3</sup>  | 1.685           | 1.685           |
| Z                      | 4               | 4               |
| Mu (mm <sup>-1</sup> ) | 2.148           | 2.148           |
| F000                   | 592.0           | 592.0           |
| F000'                  | 593.40          |                 |
| h,k,lmax               | 9,28,9          | 9,28,9          |
| Nref                   | 1422            | 1407            |
| Tmin,Tmax              | 0.440,0.424     |                 |
| Tmin'                  | 0.407           |                 |

Correction method= Not given

Data completeness= 0.989                      Theta(max)= 27.490

R(reflections)= 0.0718( 879)                      wR2(reflections)= 0.1113( 1407)

S = 1.102                                      Npar= 99

---

The following ALERTS were generated. Each ALERT has the format

**test-name\_ALERT\_alert-type\_alert-level.**

Click on the hyperlinks for more details of the test.

---

### Alert level B

|                                     |                              |           |
|-------------------------------------|------------------------------|-----------|
| PLAT213_ALERT_2_B Atom N2           | has ADP max/min Ratio .....  | 5.0 prola |
| PLAT220_ALERT_2_B Large Non-Solvent | N      Ueq(max)/Ueq(min) ... | 4.5 Ratio |

---

● **Alert level C**

|                   |                                               |                                  |                   |     |            |
|-------------------|-----------------------------------------------|----------------------------------|-------------------|-----|------------|
| PLAT213_ALERT_2_C | Atom C6                                       | has ADP max/min Ratio            | .....             | 3.5 | prola      |
| PLAT220_ALERT_2_C | Large Non-Solvent                             | C                                | Ueq(max)/Ueq(min) | ... | 3.5 Ratio  |
| PLAT234_ALERT_4_C | Large Hirshfeld Difference                    | N1                               | -- C4B            | ..  | 0.16 Ang.  |
| PLAT242_ALERT_2_C | Check Low                                     | Ueq as Compared to Neighbors for |                   |     | N1         |
| PLAT242_ALERT_2_C | Check Low                                     | Ueq as Compared to Neighbors for |                   |     | C6         |
| PLAT250_ALERT_2_C | Large U3/U1 Ratio for Average U(i,j) Tensor   | ....                             |                   |     | 3.2        |
| PLAT341_ALERT_3_C | Low Bond Precision on                         | C-C Bonds                        | .....             |     | 0.0105 Ang |
| PLAT790_ALERT_4_C | Centre of Gravity not Within Unit Cell: Resd. | #                                |                   |     | 1          |
|                   | C9 H10 N2 O5 Zn                               |                                  |                   |     |            |

---

● **Alert level G**

|                   |                                                  |           |        |    |              |
|-------------------|--------------------------------------------------|-----------|--------|----|--------------|
| PLAT002_ALERT_2_G | Number of Distance or Angle Restraints on AtSite |           |        |    | 2            |
| PLAT004_ALERT_5_G | Info: Polymeric Structure Found with Dimension   |           |        |    | 3            |
| PLAT005_ALERT_5_G | No _iucr_refine_instructions_details in CIF      | ....      |        |    | ?            |
| PLAT083_ALERT_2_G | SHELXL Second Parameter in WGHT Unusually Large. |           |        |    | 5.83         |
| PLAT153_ALERT_1_G | The su's on the Cell Axes                        | are Equal | .....  |    | 0.00500 Ang. |
| PLAT194_ALERT_1_G | Missing _cell_measurement_reflms_used datum      | ....      |        |    | ?            |
| PLAT195_ALERT_1_G | Missing _cell_measurement_theta_max datum        | ....      |        |    | ?            |
| PLAT196_ALERT_1_G | Missing _cell_measurement_theta_min datum        | ....      |        |    | ?            |
| PLAT199_ALERT_1_G | Check the Reported _cell_measurement_temperature |           |        |    | 293 K        |
| PLAT200_ALERT_1_G | Check the Reported _diffrn_ambient_temperature   |           |        |    | 293 K        |
| PLAT301_ALERT_3_G | Note: Main Residue Disorder                      | .....     |        |    | 23 Perc.     |
| PLAT432_ALERT_2_G | Short Inter X...Y Contact                        | C7A       | .. C7A | .. | 2.19 Ang.    |
| PLAT432_ALERT_2_G | Short Inter X...Y Contact                        | C7A       | .. C8A | .. | 2.68 Ang.    |
| PLAT720_ALERT_4_G | Number of Unusual/Non-Standard Labels            | .....     |        |    | 1            |
| PLAT764_ALERT_4_G | Overcomplete CIF Bond List Detected (Rep/Expd)   |           |        |    | 1.14 Ratio   |
| PLAT793_ALERT_4_G | The Model has Chirality at C2                    | (Verify)  | ....   |    | S            |
| PLAT811_ALERT_5_G | No ADDSYM Analysis: Too Many Excluded Atoms      | ....      |        |    | !            |
| PLAT860_ALERT_3_G | Note: Number of Least-Squares Restraints         | .....     |        |    | 1            |

---

0 **ALERT level A** = Most likely a serious problem - resolve or explain  
2 **ALERT level B** = A potentially serious problem, consider carefully  
8 **ALERT level C** = Check. Ensure it is not caused by an omission or oversight  
18 **ALERT level G** = General information/check it is not something unexpected

6 ALERT type 1 CIF construction/syntax error, inconsistent or missing data  
11 ALERT type 2 Indicator that the structure model may be wrong or deficient  
3 ALERT type 3 Indicator that the structure quality may be low  
5 ALERT type 4 Improvement, methodology, query or suggestion  
3 ALERT type 5 Informative message, check

---

It is advisable to attempt to resolve as many as possible of the alerts in all categories. Often the minor alerts point to easily fixed oversights, errors and omissions in your CIF or refinement strategy, so attention to these fine details can be worthwhile. In order to resolve some of the more serious problems it may be necessary to carry out additional measurements or structure refinements. However, the purpose of your study may justify the reported deviations and the more serious of these should normally be commented upon in the discussion or experimental section of a paper or in the "special\_details" fields of the CIF. checkCIF was carefully designed to identify outliers and unusual parameters, but every test has its limitations and alerts that are not important in a particular case may appear. Conversely, the absence of alerts does not guarantee there are no aspects of the results needing attention. It is up to the individual to critically assess their own results and, if necessary, seek expert advice.

### **Publication of your CIF in IUCr journals**

A basic structural check has been run on your CIF. These basic checks will be run on all CIFs submitted for publication in IUCr journals (*Acta Crystallographica*, *Journal of Applied Crystallography*, *Journal of Synchrotron Radiation*); however, if you intend to submit to *Acta Crystallographica Section C* or *E*, you should make sure that full publication checks are run on the final version of your CIF prior to submission.

### **Publication of your CIF in other journals**

Please refer to the *Notes for Authors* of the relevant journal for any special instructions relating to CIF submission.

---

**PLATON version of 15/02/2012; check.def file version of 10/02/2012**

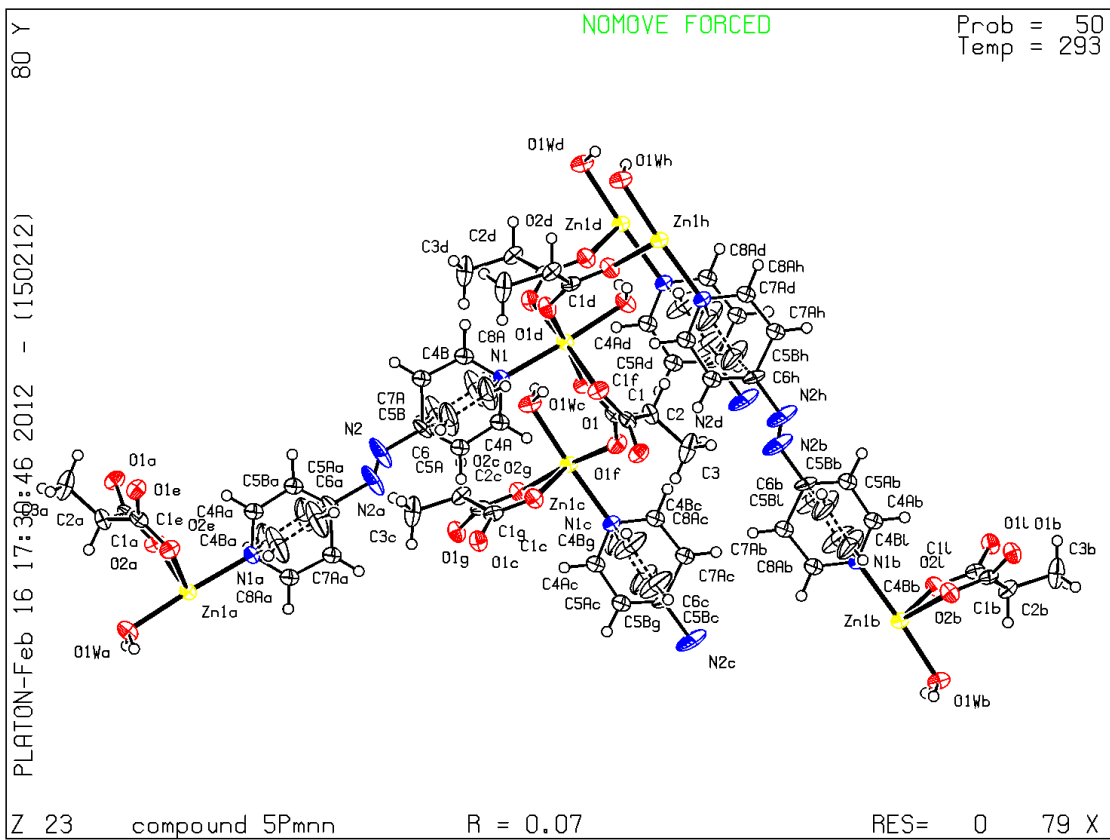

Supplement: mmc5 [file mmc5.pdf]
